# Supplementary material for: Disruption of the rice nitrate transporter OsNPF2.2 hinders root-to-shoot nitrate transport and vascular development
Source: PubMed Central journal article supplement (PMC5386202; doi:10.1038/srep09635), 2015-04-29

# **Disruption of the Rice Nitrate Transporter OsNPF2.2 Hinders Root-to-Shoot Nitrate Transport and Vascular Development**

Yuge Li<sup>1†</sup>, Jie Ouyang<sup>2†</sup>, Ya-Yun Wang<sup>3</sup>, Rui Hu<sup>1,4</sup>, Kuaifei Xia<sup>1</sup>, Jun Duan<sup>1</sup>, Yaqin Wang<sup>5</sup>, Yi-Fang Tsay<sup>6</sup> & Mingyong Zhang<sup>1\*</sup>

<sup>1</sup>*Key Laboratory of South China Agricultural Plant Molecular Analysis and Genetic Improvement & Guangdong Provincial Key Laboratory of Applied Botany, South China Botanical Garden, Chinese Academy of Sciences, Guangzhou 510650, China;*

<sup>2</sup>*Rice Institute, Chongqing Academy of Agricultural Sciences, Chongqing 401329, China;* <sup>3</sup>*Department of life science, National Taiwan University, Taipei, Taiwan;*

<sup>4</sup>*University of Chinese Academy of Sciences, Beijing 100049, China;* <sup>5</sup>*Guangdong Key Lab of Biotechnology for Plant Development, College of Life Science, South China Normal University, Guangzhou 510631, China;* and <sup>6</sup>*Institute of Molecular Biology, Academia Sinica, Taipei, Taiwan*

† These authors contributed equally to this work.

\* To whom correspondence should be addressed. E-mail zhangmy@scbg.ac.cn, tel. +86 20 3725 2891

Supplementary figure legends

**Figure S1.** Alignment of the amino-acid sequence for OsNPF2.2 to those of several nitrate and glucosinolate transporters from *Arabidopsis*.

**Figure S2.** Spatiotemporal expression profile of *OsNPF2.2* in various organs throughout the entire life cycle of rice under natural paddy conditions.

**Figure S3.** *OsNPF2.2*-RNAi phenotypic copy of the *osnpf2.2* mutants.

(a) Relative expression level of the independent *OsNPF2.2*-RNAi transgenic lines by qRT-PCR analysis. (b-c) Comparison of the seedling growth between the *OsNPF2.2*-RNAi transgenic lines and the wild types (WT), bar = 2cm. (d) Panicle length comparison of the *OsNPF2.2*-RNAi transgenic lines and the wild types (WT), bar = 2cm. (e, f) Statistic analysis of panicle length and seed setting rate of the transgenic lines and the wild types.

**Figure S4.** Growth retardation of the *osnpf2.2* mutants when low or high levels of nitrate were supplied.

(a-c) The seedlings were grown in IRRI solution for two weeks with 0.2 mM (a), 1.4 mM (b) or 10 mM (c) nitrate as sole N source, bar = 2cm. (d) Statistic analysis of plant height under different concentration of nitrate. One or double asterisks indicate a significant difference ( $P < 0.05$  or  $P < 0.01$ ) of plant height (d) compared with the values of the wild types.

**Figure S5.** Cross sections of various organs from wild-type plants and the *osnpf2.2*

mutants.

Less and disordered arrangement of vascular bundles were observed in culms (a-d, bar: 50  $\mu\text{m}$ ), leave blades (e-h, bar = 20  $\mu\text{m}$ ), leave sheath (i-l, bar = 50  $\mu\text{m}$ ), primary branches (m-p, bar = 10  $\mu\text{m}$ ), anthers (q-t, bar = 50  $\mu\text{m}$ ), and filaments (u-x, bar = 20  $\mu\text{m}$ ) of the *osnpf2.2* mutants, compared with the wild types. WT, wild-type.

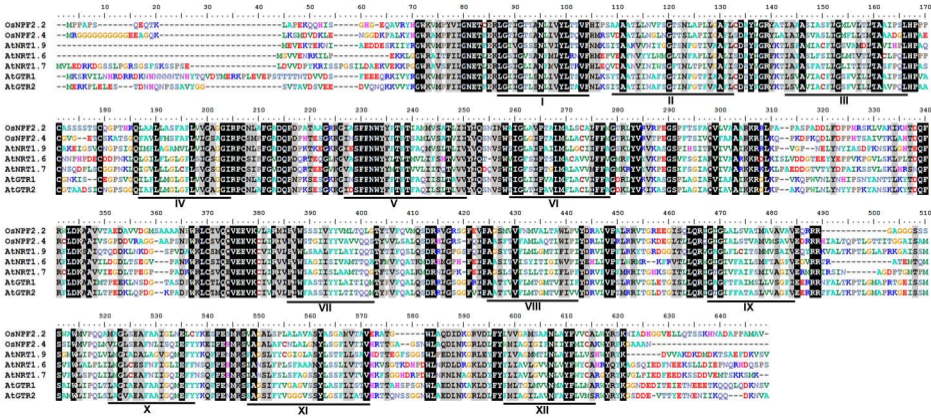

## RXP\_0001: Organs and tissues; Os12g0638200\_34105

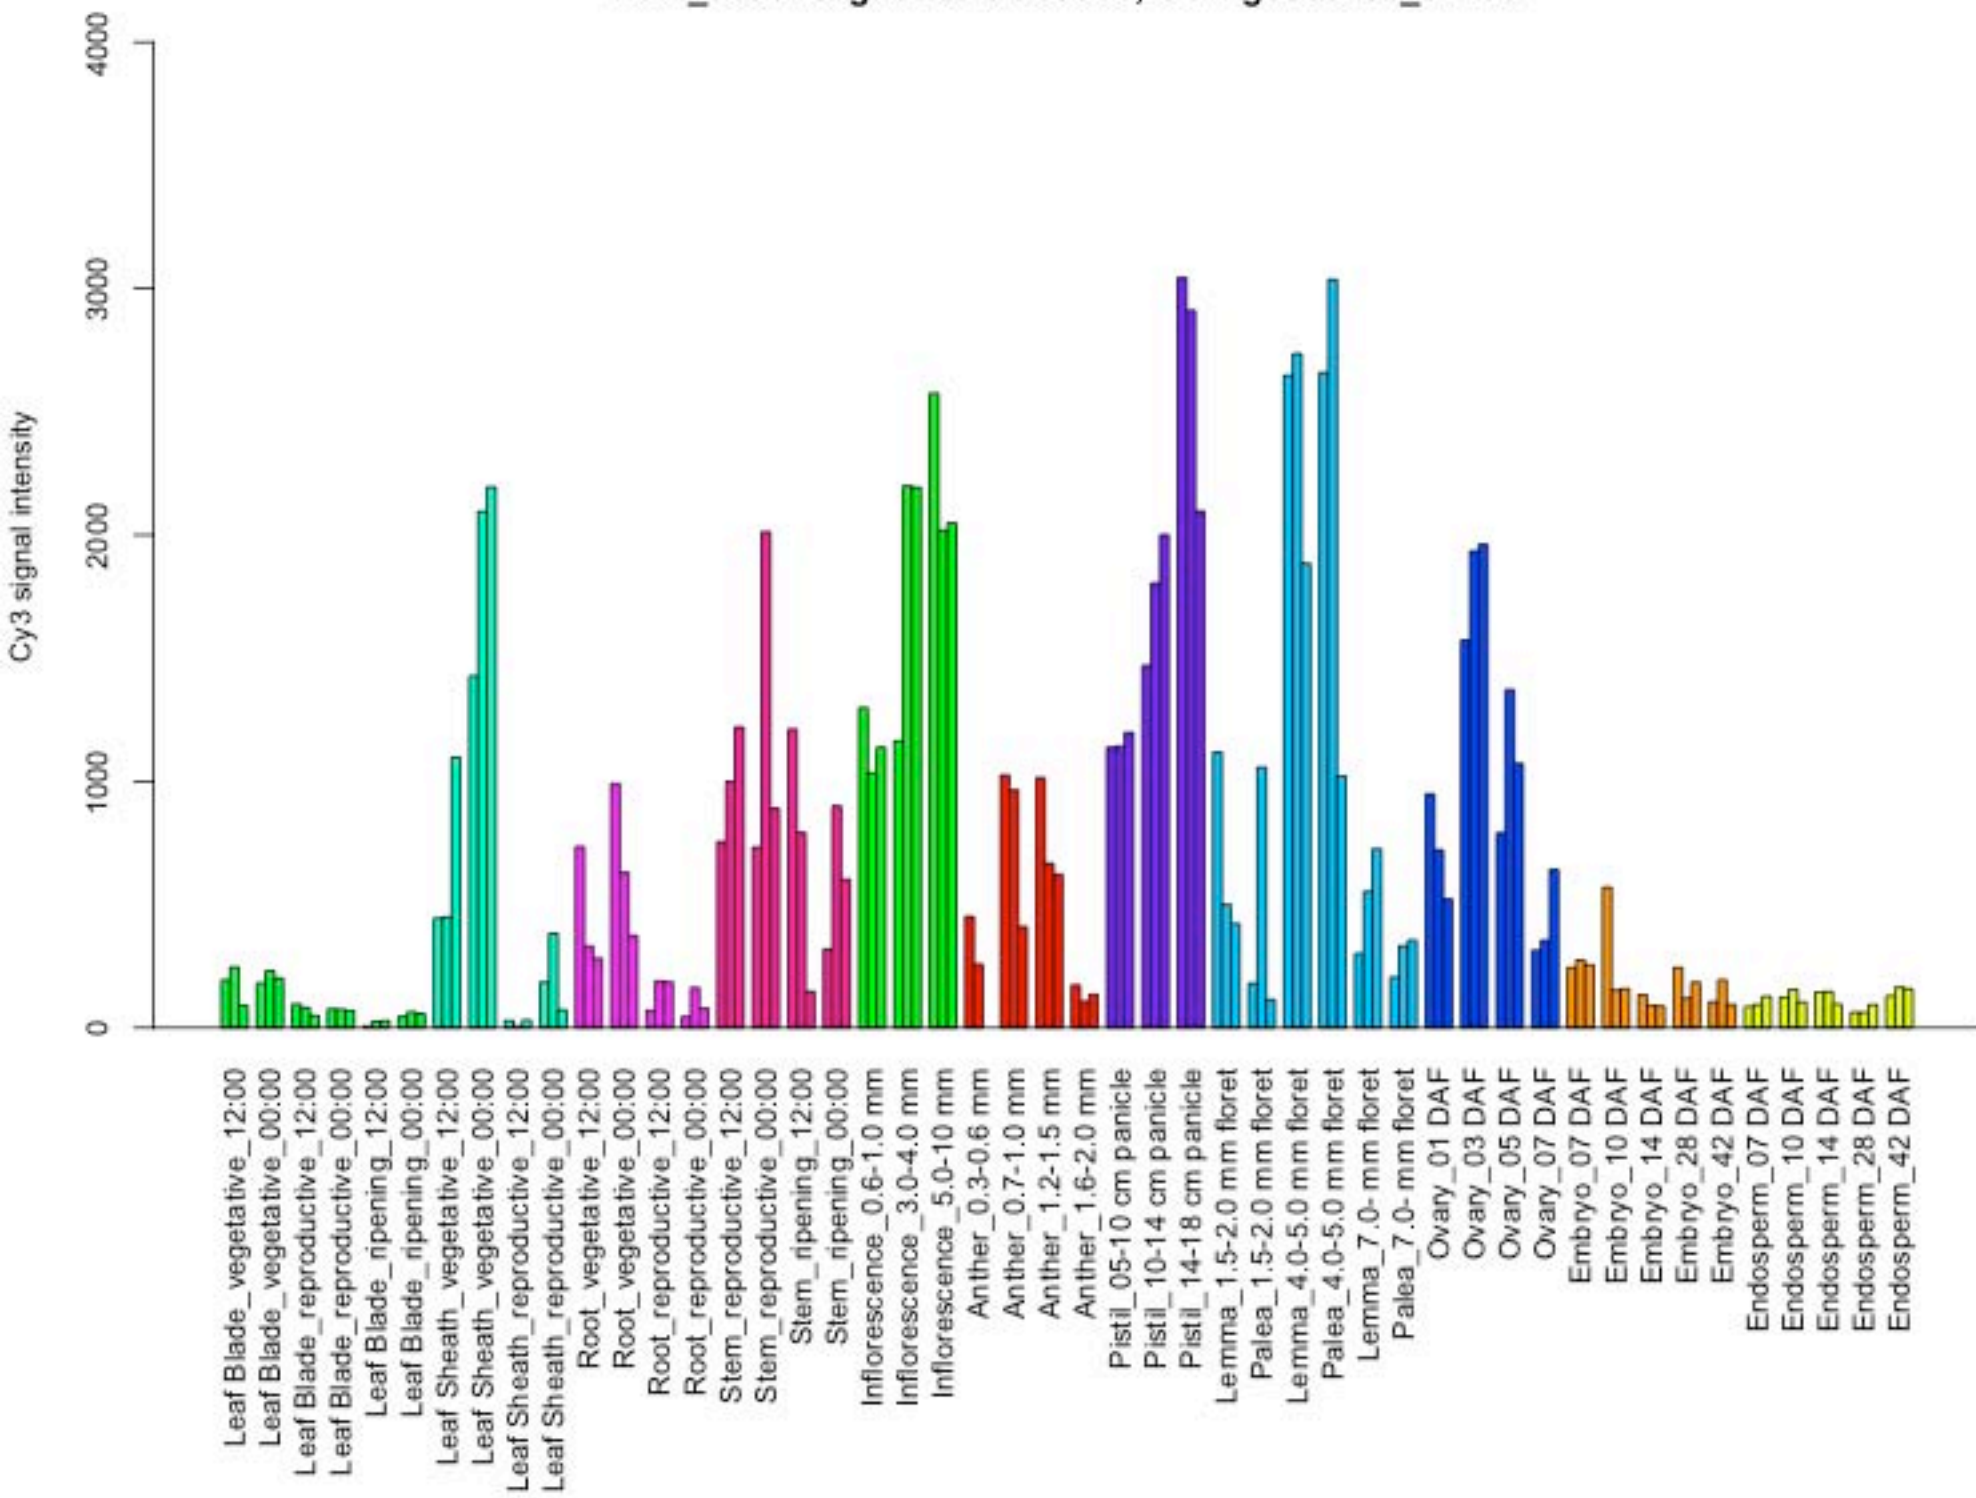

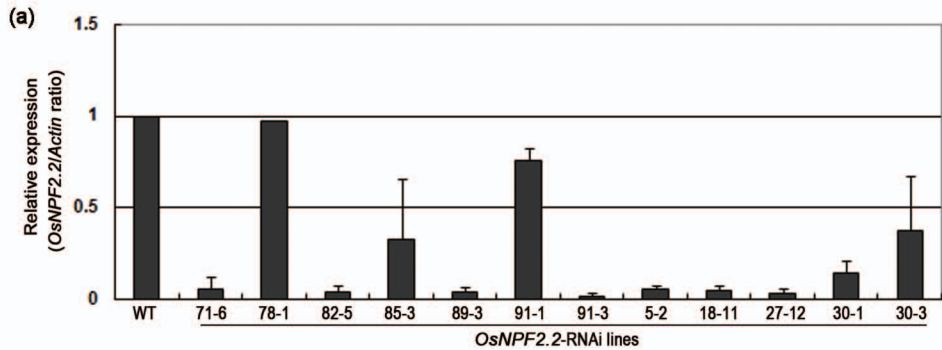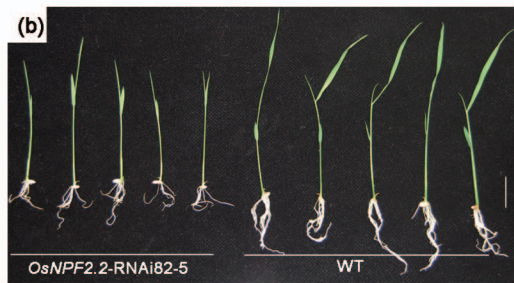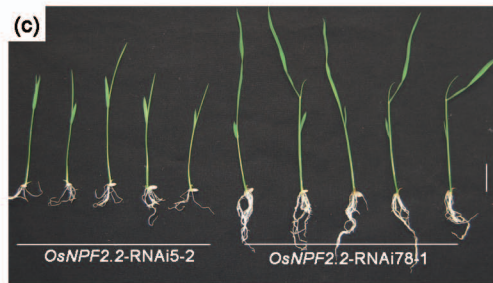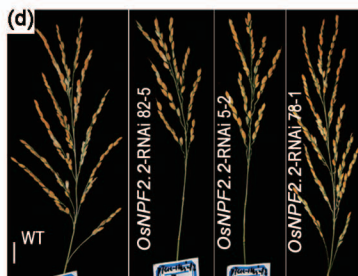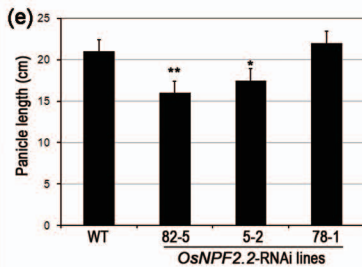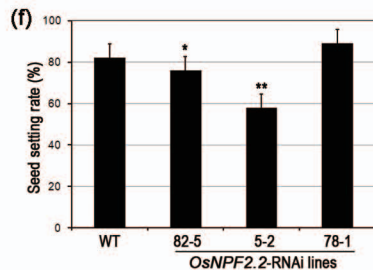

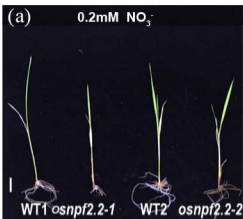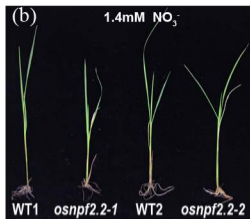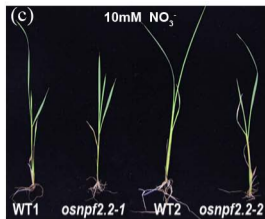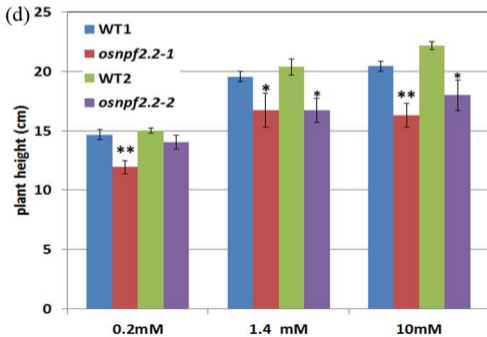



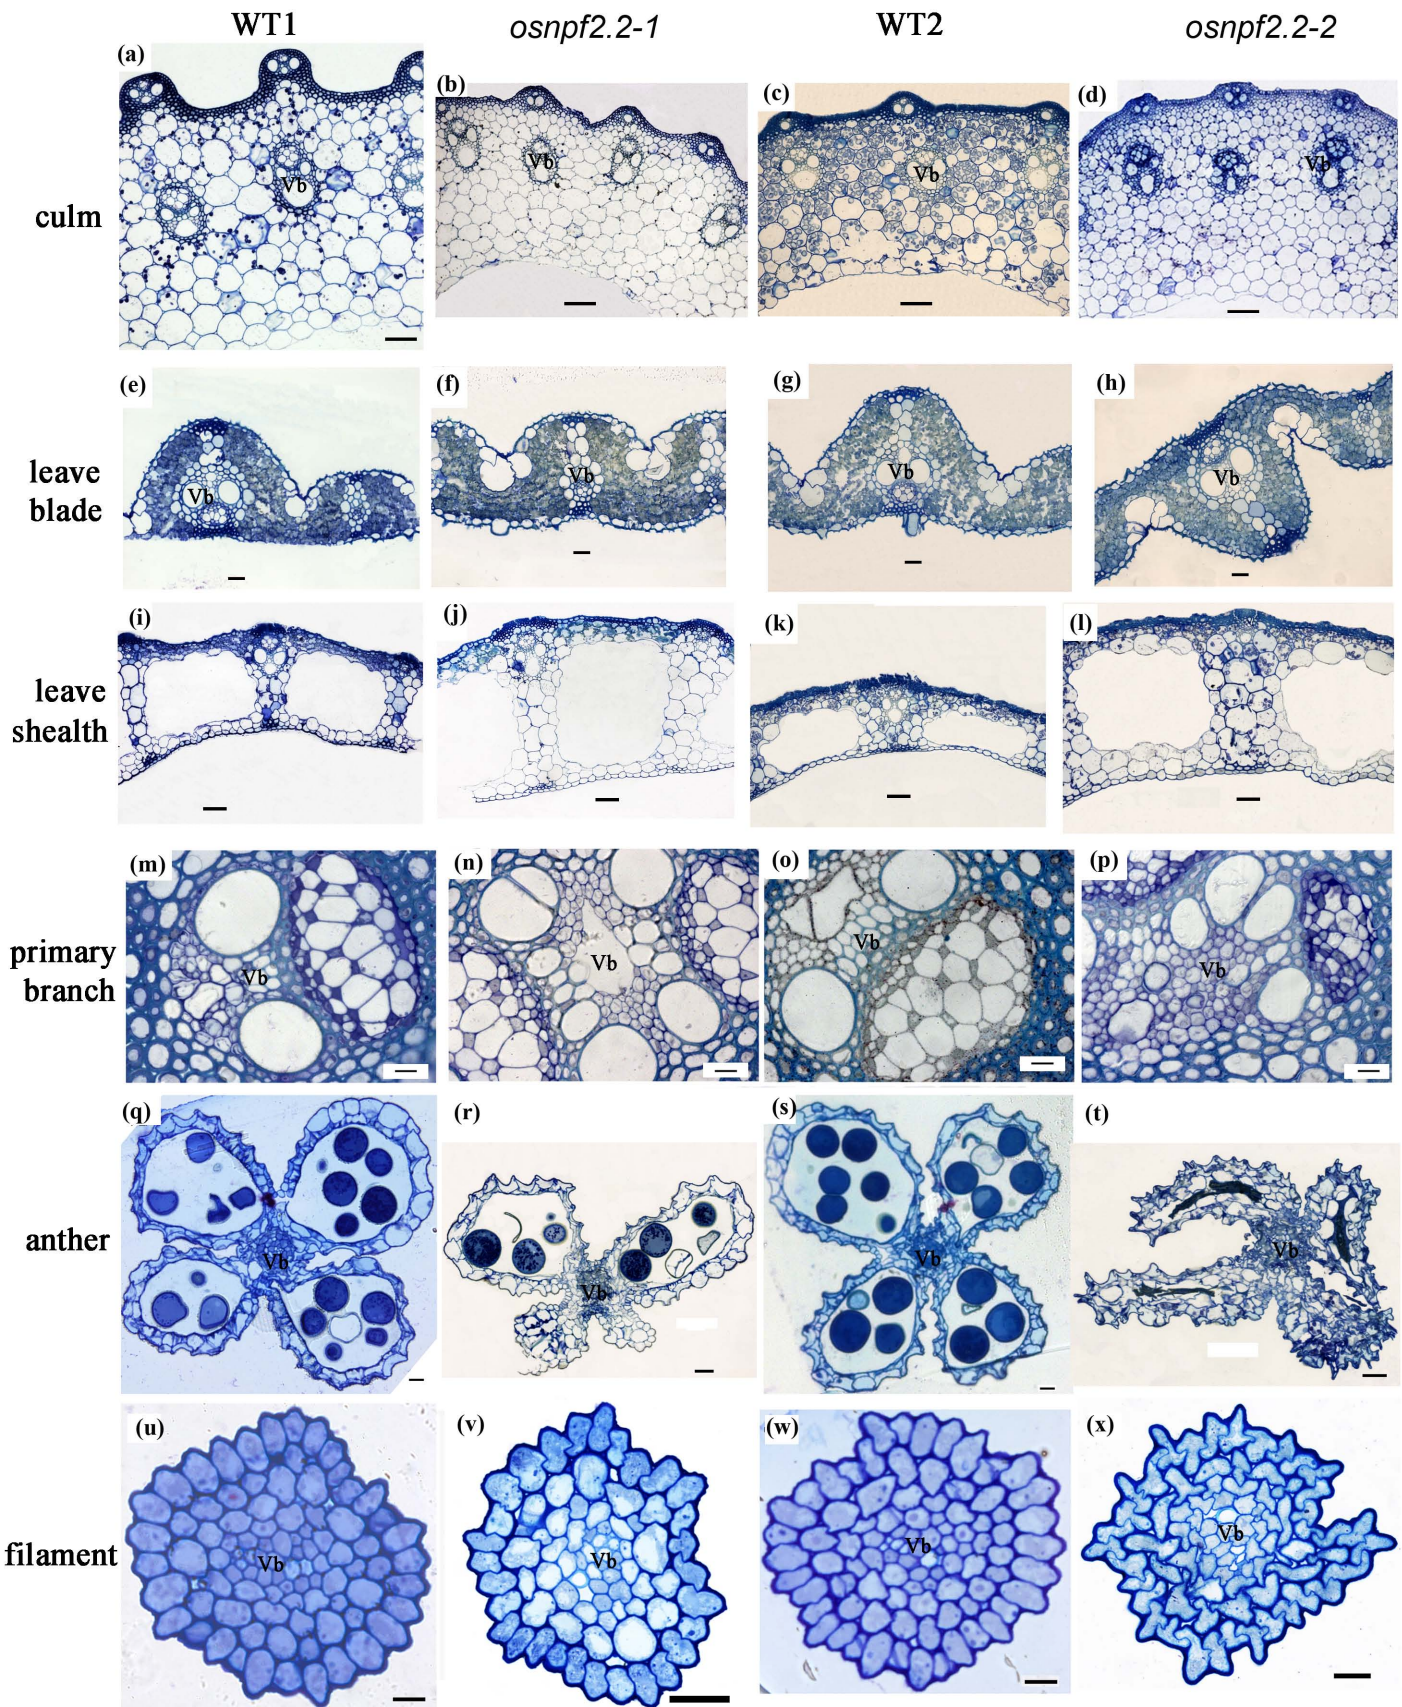

Supplement: srep09635-s1.pdf [file srep09635-s1.pdf]
